# Supplementary material for: Underinsurance among Children in the United States
Source: Atypon-hosted journal article supplement (doi:10.1056/nejmsa0909994), 2010-08-25
Supplement: nejmsa0909994_appendix.pdf [file nejmsa0909994_appendix.pdf]

## Supplementary Appendix

This appendix has been provided by the authors to give readers additional information about their work.

Supplement to: Kogan MD, Newacheck PW, Blumberg SJ, et al. Underinsurance among children in the United States. *N Engl J Med* 2010;363:841-51.

**Supplemental Online Appendix**  
**Adjusted Odds Ratios\* for the Comparative Associations of being Never Insured and Sometimes Insured to Underinsured (using Underinsured as the Reference Group) on Measures of Health Care Access and Quality for U.S. Children, 2007**

|                                                                                      | <b>MEASURES OF INSURANCE COVERAGE AND ADEQUACY</b> |                                       |                                                                      |                                                                             |
|--------------------------------------------------------------------------------------|----------------------------------------------------|---------------------------------------|----------------------------------------------------------------------|-----------------------------------------------------------------------------|
|                                                                                      | <b>Uninsured</b>                                   |                                       | <b>Fully Insured</b>                                                 | <b>Underinsured</b>                                                         |
| <b>Measure of Health Care Access and Quality (Dependent Variables)</b>               | <b>Never Insured AOR (95% CI)</b>                  | <b>Sometimes Insured AOR (95% CI)</b> | <b>Continuously Insured and Health Plan is Adequate AOR (95% CI)</b> | <b>Continuously Insured but Health Plan is Inadequate (reference group)</b> |
| <b>Child Did Not Have a Medical Home**</b>                                           | 1.07 (0.84, 1.38)                                  | 0.86 (0.75, 0.99)                     | 0.43 (0.39, 0.47)                                                    | 1.00                                                                        |
| <b>Did Not Have a Usual Source of Care</b>                                           | 2.95 (2.19, 3.96)                                  | 1.45 (1.11, 1.88)                     | 0.73 (0.59, 0.90)                                                    | 1.00                                                                        |
| <b>Did Not Have a Personal Doctor or Nurse</b>                                       | 3.74 (2.85, 4.90)                                  | 1.56 (1.22, 1.98)                     | 0.74 (0.61, 0.89)                                                    | 1.00                                                                        |
| <b>Had Difficulty Receiving Referrals for Needed Care***</b>                         | 1.10 (0.67, 1.79)                                  | 0.88 (0.62, 1.24)                     | 0.38 (0.30, 0.49)                                                    | 1.00                                                                        |
| <b>Had Difficulty Receiving Care Coordination****</b>                                | 1.35 (0.90, 2.02)                                  | 1.16 (0.94, 1.43)                     | 0.37 (0.32, 0.42)                                                    | 1.00                                                                        |
| <b>Lacked Family-Centered Care</b>                                                   | 1.11 (0.85, 1.44)                                  | 0.73 (0.63, 0.85)                     | 0.38 (0.34, 0.42)                                                    | 1.00                                                                        |
| <b>Had Delayed or Forgone Care in Last Year</b>                                      | 1.23 (0.90, 1.68)                                  | 1.80 (1.46, 2.22)                     | 0.29 (0.24, 0.35)                                                    | 1.00                                                                        |
| <b>Had Difficulty Receiving Specialist Care<sup>#</sup></b>                          | 0.73 (0.42, 1.27)                                  | 1.02 (0.74, 1.39)                     | 0.48 (0.40, 0.59)                                                    | 1.00                                                                        |
| <b>Did Not Receive a Medical Preventive Visit in Last Year</b>                       | 4.21 (3.29, 5.40)                                  | 1.30 (1.06, 1.58)                     | 0.84 (0.73, 0.97)                                                    | 1.00                                                                        |
| <b>Did Not Receive Developmental Screening at Preventive Care Visit<sup>##</sup></b> | 2.40 (1.45, 3.97)                                  | 1.12 (0.80, 1.58)                     | 0.87 (0.69, 1.09)                                                    | 1.00                                                                        |

\* All models (dependent variables: Child did not have a medical home (and its components: Did not have a usual source of care; Did not have a personal doctor or nurse; Had difficulty receiving referrals for needed care; Had difficulty receiving care coordination; and Lacked family-centered care); Had delayed or forgone care in the last year; Had difficulty receiving specialist care; Did not receive a medical preventive visit in last year; and Did not receive development screening at preventive care visit) adjusted for child's age, gender, race/ethnicity, household poverty level, region of the country, family structure, primary language spoken at home, at least one family member

employed 50 weeks in the last year, child health status, and the complexity of the child's health care needs, based on the number of different domains that the child screened in for.<sup>23</sup>

\*\* The presence of a medical home was based on an algorithm utilizing 5 components of the American Academy of Pediatrics' definition: Usual place for care; a personal provider; ease obtaining referrals; coordinated care; and family-centered, compassionate, and culturally appropriate care.

\*\*\* Among those who needed referrals.

\*\*\*\* Among those who needed care coordination.

# Among those who needed specialist care.

## Among those aged 10-71 months only.
